# Supplementary material for: Understanding Complex Relationships between Human Well-Being and Land Use Change in Mozambique Using a Multi-Scale Participatory Scenario Planning Process
Source: MDPI journal article supplement (doi:10.3390/su132313030), 2021-11-25
Supplement: s1 [file s1]

### **Supplementary S3**

Detailed description of participants representatives from each sector (government, private sector, NGOs and academia) in each of the five workshops developed.

#### **MAPUTO - 12/08/2014**

|                                                   |                                                                                               |
|---------------------------------------------------|-----------------------------------------------------------------------------------------------|
| MAE-DNPDR                                         | Ministry of state administration. National directorate for the promotion of rural development |
| MINAG-DNGA                                        | Ministry of Agriculture, National Directorate of Environmental Management                     |
| Associação Rural de Ajuda Mútua (ORAM)-<br>Maputo | National NGO - Rural Mutual Aid Association                                                   |
| ACTIONAID                                         | International NGO - ACTIONAID                                                                 |
| DPA-Niassa                                        | Agricultural Provincial Department - Manica                                                   |
| OXFAM                                             | International NGO – OXFAM                                                                     |
| UNAC (União Nacional de Camponeses)-<br>Maputo    | National NGO - National Peasants Union                                                        |
| UEM- FAEF                                         | University of agriculture and forestry                                                        |
| DPTUR-Niassa                                      | Provincial Directorate of Tourism, Niassa                                                     |
| UEM-FAEF                                          | University of agriculture and forestry                                                        |
| DPPF-Manica                                       | Provincial Directorate for Planning and Finance-Manica                                        |
| DPPF-Niassa                                       | Provincial Directorate for Planning and Finance-Niassa                                        |
| UECU-A. Politécnica                               | Polytechnic University                                                                        |
| DIPREME-Manica                                    | Provincial Directorate of rural energy market - Manica                                        |
| UEM-FAEF                                          | University of agriculture and forestry                                                        |
| MIREM-DNM                                         | Ministry of Mineral Resources, National Directorate of Mines                                  |
| IUCN                                              | International NGO - IUCN                                                                      |
| UEM-FAGE/DEF                                      | University of agriculture and forestry                                                        |
| DPCA-Manica                                       | Provincial Directorate of environmental action - Manica                                       |

|              |                                                                                               |
|--------------|-----------------------------------------------------------------------------------------------|
| MAE-DNPDR    | Ministry of state administration. National directorate for the propotion of rural development |
| DPRME-Niassa | Provincial Directorate of rural energy market - Niassa                                        |
| DPA-Manica   | Agricultural Provincial Department - Manica                                                   |
| MINAG-DE     | Agricultural ministry                                                                         |

**XAI-XAI- 14/08/2014**

|                                                           |                                                                         |
|-----------------------------------------------------------|-------------------------------------------------------------------------|
| SDAE-CHIGUBO*                                             | District Services for Economic Activities-CHIGUBO                       |
| SDAE-BILENE*                                              | District Services for Economic Activities-BILENE                        |
| SDAE-MANDLAKAZI*                                          | District Services for Economic Activities-MANDLAKAZI                    |
| SPP/APA-GAZA                                              | Provincial Directorate of Agriculture and Food Security - Gaza province |
| SPFFB-GAZA                                                | Provincial services of forests and wild animals - Gaza province         |
| SPFFB-GAZA                                                | Provincial services of forests and wild animals - Gaza province         |
| SPFFB-GAZA                                                | Provincial services of forests and wild animals - Gaza province         |
| SPFFB-GAZA                                                | Provincial services of forests and wild animals - Gaza province         |
| SDAE-MABALANE*                                            | District Services for Economic Activities-MABALANE                      |
| SDAE-CHICUALUACUA*                                        | District Services for Economic Activities-CHICUALUACUA                  |
| SDAE-MASSANGEMA*                                          | District Services for Economic Activities-MASSANGEMA                    |
| Associação Rural de Ajuda Mútua (ORAM) Zona Sud           | National NGO - Rural Mutual Aid Association                             |
| Foro de Organizaciones No Gubernamentales de Gaza (FONGA) | National NGO - Forum of Gaza Non-Governmental Organisations             |
| Foro de Organizaciones No Gubernamentales de Gaza (FONGA) | National NGO - Forum of Gaza Non-Governmental Organisations             |

\* District Services for Economic Activities are the main governmental institution in the districts.

### **Lichinga 04-05 de Agosto de 2015**

UP-Niassa

Associação Rural de Ajuda Mútua (ORAM) -  
Niassa

U.C.A. Lichinga

UN Lúrio

We Effect

DPA- Niassa

DPA-Niassa

SDPI- Marrupa

Eco Turismo

SPGC- Niassa

DPA- SPFFB

DPA- SPFFB

Reserva National

D.P.R.M Energia

UCM-FAGRI

DPA- Niassa

SDAE- Marrupa\*

ITC- Niassa

Green Resources

WWF- Niassa

Fundação Malonda

D.P. Turismo

D.P. Turismo

Consultor Independente

U. Pedagógica

University of education of Niassa

National NGO - Rural Mutual Aid Association

Union of Peasants Associations and Cooperatives of Lichinga

University of Niassa

International NGO- We Effect

Provincial Directorate of Agriculture - Niassa

Provincial Directorate of Agriculture - Niassa

District Services Planning and Infrastructure -Marrupa

Ecotourism

Provincial Directorate for Gender, Children and Social Action - Niassa

Provincial services of forests and wild animals -Niassa province

Provincial services of forests and wild animals -Niassa province

Niassa national reserve (Natural protected area)

Provincial Directorate of rural energy market - Niassa

University of agriculture

Provincial Directorate of Agriculture-Niassa

District Services for Economic Activities-Marrupa

NGO - Community Lands Initiative

Private forest and wood processing company

International NGO- WWF

National NGO - Malonda

Provincial Directorate of Tourism, Niassa

Provincial Directorate of Tourism, Niassa

Consultant

University of education of Niassa

\* District Services for Economic Activities are the main governmental institution in the districts.

**Maputo 12 August 2015**

FAEF- UEM

DNF/DIRN

FAEF- UEM

DINAF- DF

DPAZ/SPFFB

IIAM/ CESE

Fundação MICAIA

MITADER - DINAB

Associação Rural de Ajuda Mútua (ORAM)-  
Maputo

INGC

FAEF- UEM

CTV

FAEF- UEM

Oxfam

University of agriculture and forestry

Wildlife in the Department at Central Government

University of agriculture and forestry

Directorate of Children, Adolescents and Family

Provincial Directorate of Environmental Coordination - Provincial Forest and  
Wildlife Services

University - Socio-Economic Studies

National NGO - MICAIA

Ministry of Land, Environment and Rural Development - National Directorate of  
Environment

National NGO - Rural Mutual Aid Association

National Institute of Disaster Management

University of agriculture and forestry

National NGO -Centro Terra Viva - Environmental Studies and Advocacy

University of agriculture and forestry

International NGO - OXFAM

**Quelimane 28-29 October 2015**

DP Ciência e Tecnologia Zambézia  
Escola Superior de Ciências Marinhas e  
Costeiras/UEM  
ITC - Zambézia  
DPA - SPFFB

AMAZA - Associação dos Madeiros da  
Zambézia  
Foro de Organizaciones No Gubernamentales-  
FONGA  
SDAE – Gurué\*  
Hoyo-Hoyo  
Instituto Médio Agro-Pecuário de Gurué  
SDPI Gurué  
FREPOG  
UNIZAMBEZE  
UT-REDD+

SPP - DPAZ  
APAMAZ  
Associação Rural de Ajuda Mútua (ORAM) -  
Zambézia  
DPTADR - Zambézia  
A. Politécnica  
IIAM Zambezia  
DPRME - Zambézia

Provincial Directorate of Science and Technology Zambezia  
university of Marine and Coastal Sciences

National NGO - Community Lands Initiative  
Provincial Directorate of Environmental Coordination - Provincial Forest and Wildlife  
Services  
Zambezia Wood Companies Association

National NGO - Forum of Non-Governmental Organisations

District Services for Economic Activities-Gurué  
Agribusiness  
Gurué Agricultural and Livestock Institute  
District Services Planning and Infrastructure -Gurué  
FREPOG  
University of Zambezia Province  
REDD + Technical Unit of Ministry of Land, Environment and Rural Development  
(MITADER)  
Provincial services of livestock  
Provincial Association of Zambézia Agro-Livestock and Wood Producers  
National NGO - Rural Mutual Aid Association - Zambézia  
  
Provincial Directorate of Land Environment and Development - Zambézia  
University politechnic  
Mozambique Agricultural Research Institute - Zambézia  
Provincial Directorate of wood resources

DPEF - Direcção Provincial de Economia e Finanças      Provincial Directorate of Economy and Finance

\* District Services for Economic Activities are the main governmental institution in the districts.
